# Supplementary material for: Controllable synthesis of platinum–tin intermetallic nanoparticles with high electrocatalytic performance for ethanol oxidation
Source: Royal Society of Chemistry journal article supplement (doi:10.1039/d1qi01644j), 2022-01-01
Supplement: d1qi01644j1.pdf [file d1qi01644j1.pdf]

## Controllable Synthesis of Platinum-Tin Intermetallic Nanoparticles with High Electrocatalytic Performance for Ethanol Oxidation

Qian Di<sup>a</sup>, Xixia Zhao<sup>a</sup>, Wenjing Zhu<sup>b</sup>, Yiliang Luan<sup>e</sup>, Zhen Hou<sup>d</sup>, Xiaokun Fan<sup>d</sup>, Yan Zhou<sup>b</sup>, Shutao Wang<sup>c</sup>,  
Zewei Quan<sup>d</sup>, Jun Zhang<sup>\*a, b</sup>

<sup>a</sup> State Key Laboratory of Heavy Oil Processing, College of Chemical Engineering, China University of Petroleum, Qingdao, Shandong 266580, P. R. China.

<sup>b</sup> School of Materials Science and Engineering, China University of Petroleum (East China), Qingdao, Shandong 266580, P. R. China.

<sup>c</sup> College of Science, China University of Petroleum (East China), Qingdao, Shandong 266580, P. R. China.

<sup>d</sup> Department of Chemistry, Southern University of Science and Technology (SUSTech), Shenzhen, Guangdong 518055, P. R. China.

<sup>e</sup> First-year Research Immersion, State University of New York at Binghamton, NY, 13902

### Supplementary Figures and Tables:

**Table S1** Products under different feeding amounts of SnCl<sub>2</sub>, mole ratio values of precursors between Pt and Sn, and volume of OAc are listed.

| SnCl <sub>2</sub> / mg | Pt: Sn (mole ratio) | OAc/ ml | Product            |
|------------------------|---------------------|---------|--------------------|
| 0                      | 1: 0                | 0       | Pt                 |
| 4                      | 1: 0.415            | 0       | Pt <sub>3</sub> Sn |
| 10                     | 1: 1.04             | 0       | PtSn               |
| 15                     | 1: 1.56             | 0       | PtSn               |
| 20                     | 1: 2.07             | 0       | PtSn <sub>2</sub>  |
| 30                     | 1: 3.11             | 0       | PtSn <sub>2</sub>  |
| 40                     | 1: 4.15             | 0.250   | PtSn <sub>4</sub>  |

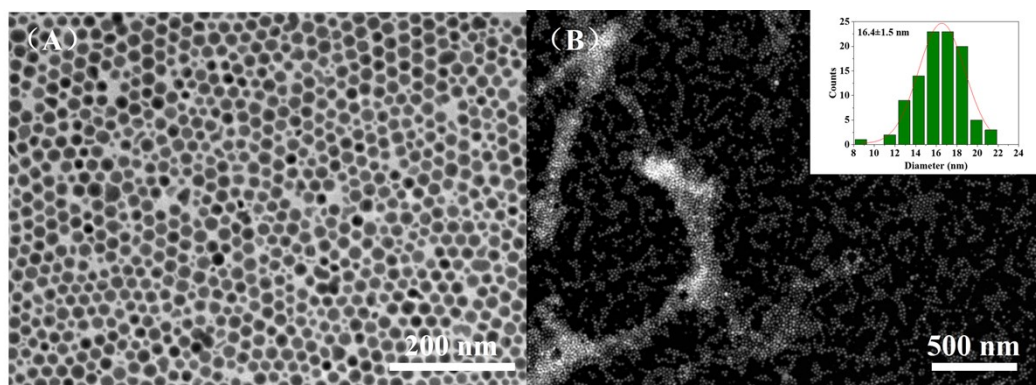

**Fig. S1** (A) TEM and (B) High-angle annular dark-field image (HAADF) of PtSn<sub>4</sub>. The inset figure is the histogram of the particle size distribution curve of PtSn<sub>4</sub>.

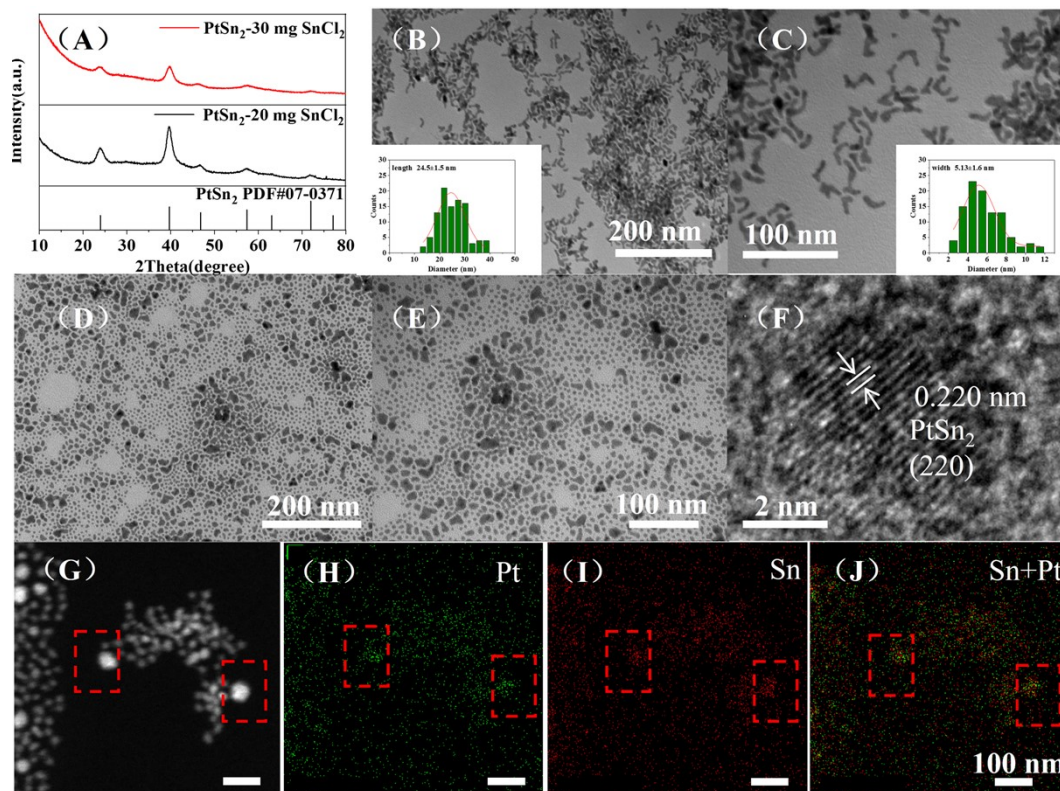

**Fig. S2** Morphology and structure characterization of  $\text{PtSn}_2$ . (A) XRD, (B-E) TEM, (F) HRTEM, and (G-J) EDS elemental mapping patterns of  $\text{PtSn}_2$  under different feeding amounts of  $\text{SnCl}_2$ . 20 mg of  $\text{SnCl}_2$  is added for (B-C); 30 mg of  $\text{SnCl}_2$  is added for (D-J). The inset figures in (B) and (C) are the histograms of the length and width of  $\text{PtSn}_2$ , respectively. The scale bar of the figure (G-I) is the same as that of the figure (J).

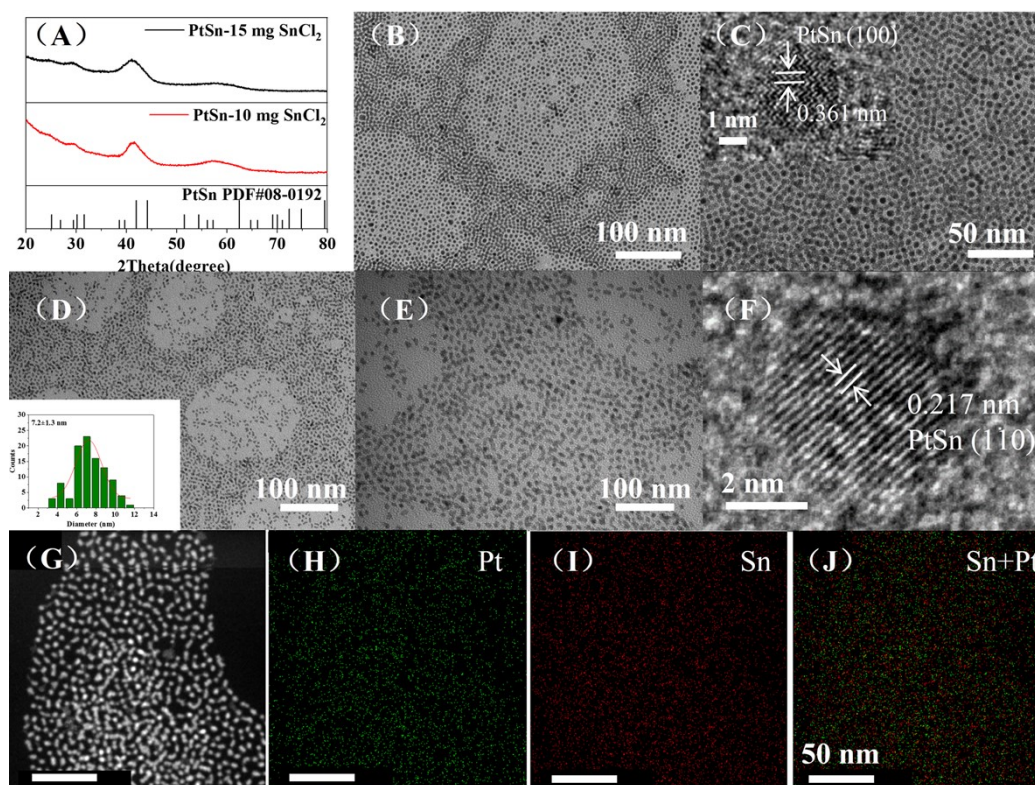

**Fig. S3** Morphology and structure characterization of PtSn. (A) XRD, (B-E) TEM, the inset figure in (C) and (F) HRTEM, and (G-J) EDS elemental mapping patterns of PtSn under different feeding amounts of SnCl<sub>2</sub>. 10 mg of SnCl<sub>2</sub> is added for (B-C); 15 mg of SnCl<sub>2</sub> is added for (D-J). The inset figure in (D) is the histogram of the particle size distribution curve of PtSn. The scale bar of the figure (G-I) is the same as that of the figure (J).

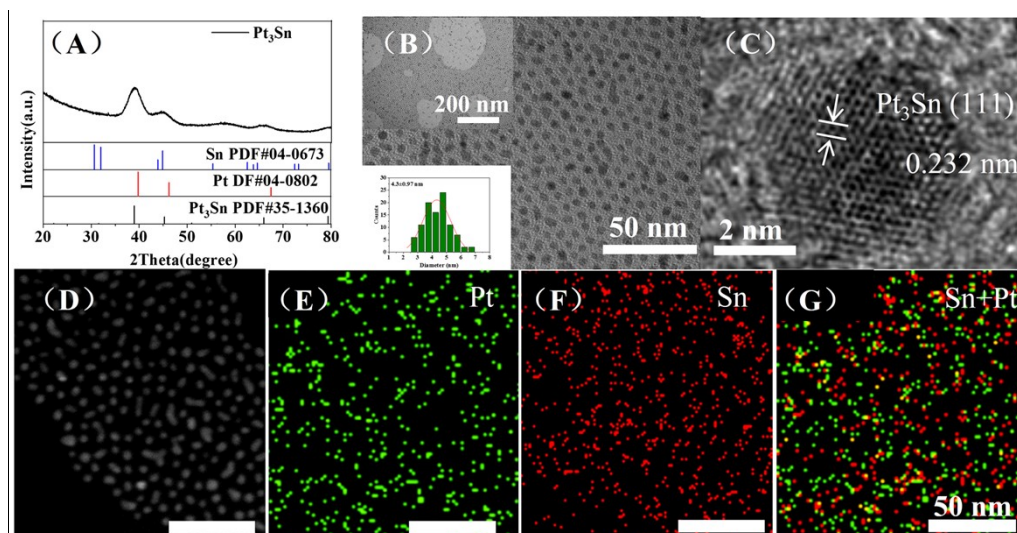

**Fig. S4** Morphology and structure characterization of  $\text{Pt}_3\text{Sn}$ . (A) XRD, (B) TEM, (C) HRTEM, and (D-G) EDS elemental mapping patterns of  $\text{Pt}_3\text{Sn}$  under the feeding amounts of 4 mg of  $\text{SnCl}_2$ . The scale bar of the figure (D-F) is the same as that of the figure (G). The inset figure in (B) is the TEM image and histogram of the particle size distribution curve of  $\text{Pt}_3\text{Sn}$ .

**Table S2** Mole ratio value between Pt and Sn in EDS results. (10 mg of SnCl<sub>2</sub> is added for PtSn, 20 mg of SnCl<sub>2</sub> is added for PtSn<sub>2</sub>).

| EDS                | Sn    | Pt |
|--------------------|-------|----|
| Pt <sub>3</sub> Sn | 0.712 | 1  |
| PtSn               | 1.14  | 1  |
| PtSn <sub>2</sub>  | 2.44  | 1  |
| PtSn <sub>4</sub>  | 4.68  | 1  |

**Table S3** Conditions of control experiment. The names and their corresponding conditions are listed.

| Control experiments                               | Temperature | Chemical agents                                                                      | Results                                      |
|---------------------------------------------------|-------------|--------------------------------------------------------------------------------------|----------------------------------------------|
| PtSn <sub>4</sub> without HMDS-control experiment | 220 °C      | SnCl <sub>2</sub> (40 mg), Pt(acac) <sub>2</sub> , OAm, ODE, OAC, W(CO) <sub>6</sub> | NO Sn, Pt or Pt <sub>x</sub> Sn <sub>y</sub> |
| PtSn <sub>2</sub> without HMDS control experiment | 220 °C      | SnCl <sub>2</sub> (20 mg), Pt(acac) <sub>2</sub> , OAm, ODE, W(CO) <sub>6</sub>      | NO Sn, Pt or Pt <sub>x</sub> Sn <sub>y</sub> |
| Pt HMDS controlled experiment                     | 220 °C      | HMDS, Pt(acac) <sub>2</sub> , OAm, ODE, OAC, W(CO) <sub>6</sub>                      | ca. 5 nm Pt nanoparticles                    |
| Pt without HMDS-control experiment                | 220 °C      | Pt(acac) <sub>2</sub> , OAm, ODE, OAC, W(CO) <sub>6</sub>                            | ca. 5 nm Pt nanoparticles                    |
| Sn HMDS control experiment                        | 220 °C      | HMDS, SnCl <sub>2</sub> (40 mg), OAm, ODE, OAC, W(CO) <sub>6</sub>                   | ca. 20 nm Sn nanoparticles                   |
| Sn without HMDS control experiment                | 220 °C      | SnCl <sub>2</sub> (40 mg), OAm, ODE, OAC, W(CO) <sub>6</sub>                         | SnO <sub>x</sub> (x=1,2) nanoparticles       |

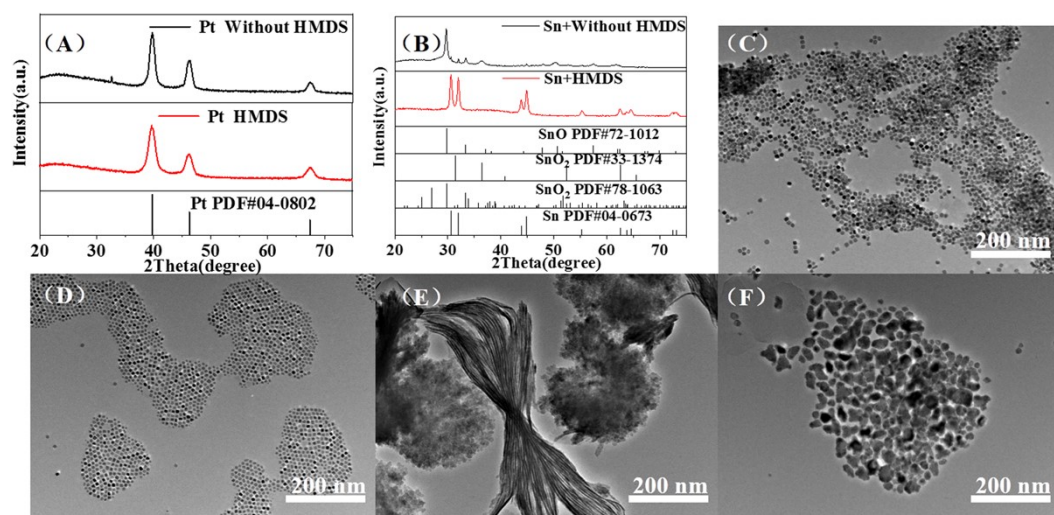

**Fig. S5** XRD (A-B) and TEM (C-F) patterns of Pt and Sn in the control experiment. (A, C, D) Pt control experiment (C) without HMDs or (D) with HMDs. (B, E, F) Sn control experiment (E) without HMDs or (F) with HMDs.

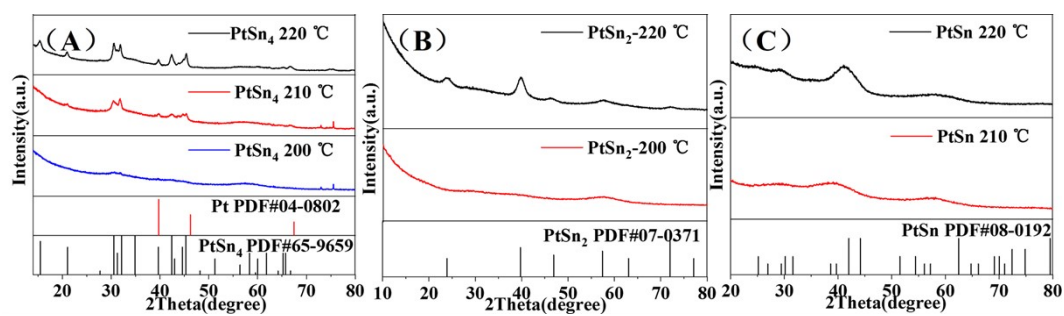

**Fig. S6** XRD patterns of  $\text{Pt}_x\text{Sn}_y$  in the temperature-dependent experiment. (A)  $\text{PtSn}_4$ , (B)  $\text{PtSn}_2$  and (C)  $\text{PtSn}$ . 40 mg, 30 mg and 15 mg of  $\text{SnCl}_2$  is added for  $\text{PtSn}_4$ ,  $\text{PtSn}_2$  and  $\text{PtSn}$ .

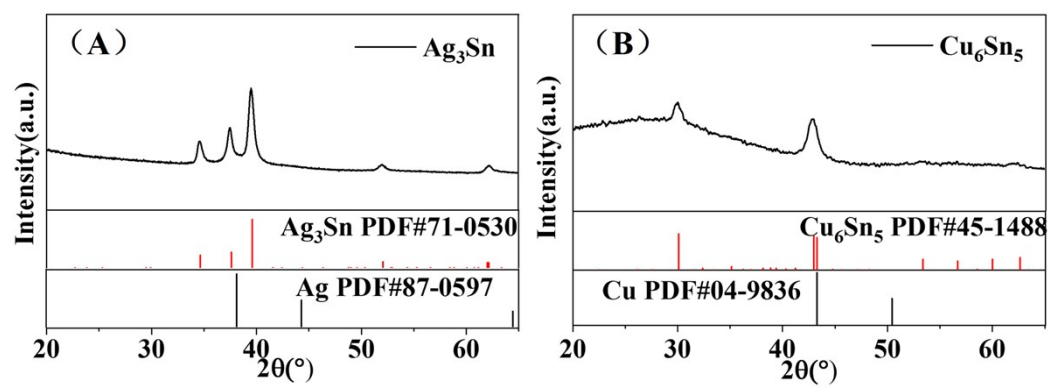

**Fig. S7** XRD patterns of (A)  $\text{Ag}_3\text{Sn}$  and (B)  $\text{Cu}_6\text{Sn}_5$ .

**Table S4** The comparison of EOR performance between Pt<sub>3</sub>Sn, PtSn, PtSn<sub>2</sub>, PtSn<sub>4</sub>, and commercial Pt/C. The specific activity of samples and their corresponding peak potential are listed.

| EOR performance                        | Pt/C  | Pt <sub>3</sub> Sn | PtSn  | PtSn <sub>2</sub> | PtSn <sub>4</sub> |
|----------------------------------------|-------|--------------------|-------|-------------------|-------------------|
| Peak potential / V vs. SCE             | 0.656 | 0.665              | 0.629 | 0.613             | 0.612             |
| ECSA/ m <sup>2</sup> g <sup>-1</sup>   | 67.1  | 57.6               | 34.8  | 30.2              | 30.9              |
| Specific activity/ mA cm <sup>-2</sup> | 1.07  | 1.09               | 2.30  | 2.11              | 1.78              |

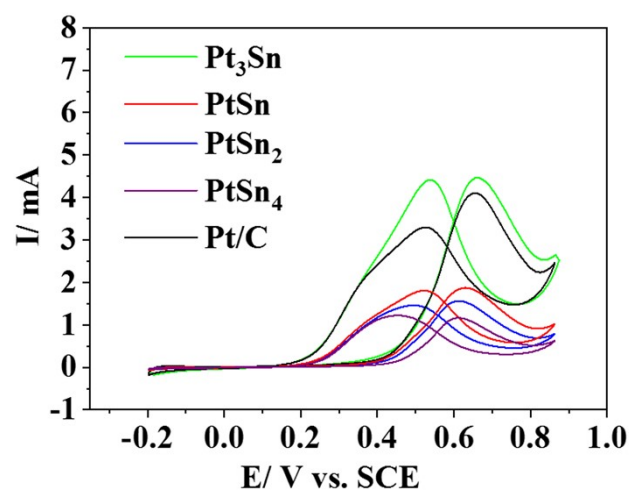

**Fig. S8** Electrocatalytic activity current for EOR.

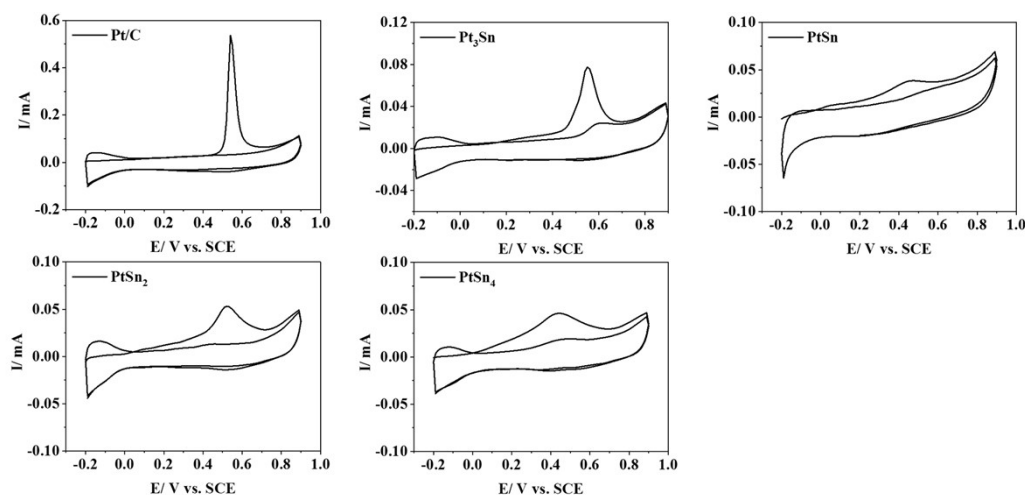

**Fig. S9** CO stripping curves of different catalysts. CO stripping curves of (A) commercial Pt/C, (B) Pt<sub>3</sub>Sn, (C) PtSn, (D) PtSn<sub>2</sub>, and (E) PtSn<sub>4</sub>. In the case of Pt<sub>x</sub>Sn<sub>y</sub>, -0.2 V vs. SCE was applied in a CO-saturated 0.5 M H<sub>2</sub>SO<sub>4</sub> solution and then N<sub>2</sub> was purged into the electrolyte, followed by a CO stripping cyclic voltammetry curve from -0.2 V vs. SCE to 0.9 V vs. SCE (Method 2). The intensity of the CO stripping peak is higher than the data obtained through Method 1, as shown in the figure. The CO stripping curve onset potentials of PtSn, PtSn<sub>2</sub>, and PtSn<sub>4</sub> start from about 0 V vs. SCE, earlier than that of Pt<sub>3</sub>Sn and commercial Pt/C, indicating weaker binding energy between PtSn, PtSn<sub>2</sub>, and PtSn<sub>4</sub> and CO.

**Table S5** Summarization of Sn 3d and Pt 4f peaks from deconvoluted XPS spectra (Fig. 5 (E-F)).

| The XPS peaks of Sn 3d and Pt 4f |                         |                         |                    |                         |                         |
|----------------------------------|-------------------------|-------------------------|--------------------|-------------------------|-------------------------|
| Sn                               | E 3d <sub>3/2</sub> /eV | E 3d <sub>5/2</sub> /eV | Pt                 | E 4f <sub>5/2</sub> /eV | E 4f <sub>7/2</sub> /eV |
| PtSn <sub>4</sub>                | 487.2                   | 495.7                   | PtSn <sub>4</sub>  | 72.5                    | 75.9                    |
| PtSn <sub>4</sub>                | 485.5                   | 494.0                   | PtSn <sub>4</sub>  | 73.6                    | 76.8                    |
| PtSn <sub>4</sub>                | -                       | -                       | PtSn <sub>4</sub>  | 71.6                    | 74.9                    |
| PtSn <sub>2</sub>                | 487.2                   | 495.7                   | PtSn <sub>2</sub>  | 72.2                    | 75.6                    |
| PtSn <sub>2</sub>                | 486.1                   | 494.6                   | PtSn <sub>2</sub>  | 73.4                    | 76.8                    |
| PtSn                             | 486.7                   | 495.2                   | PtSn               | 71.7                    | 75.1                    |
| PtSn                             | 485.9                   | 494.4                   | PtSn               | 72.3                    | 75.6                    |
| Pt <sub>3</sub> Sn               | 486.9                   | 495.3                   | Pt <sub>3</sub> Sn | 71.9                    | 75.2                    |

**Table S6** The comparison of EOR specific activity and stability between our work and some  $\text{Pt}_x\text{Sn}_y$  alloys for EOR in recent works.

| Catalyst                                        | ECSA / $\text{m}^2$<br>$\text{g}^{-1}$ | Specific activity / $\text{mA}$<br>$\text{cm}^{-2}$ | Peak potential     | Stability                                                                                      | Referenc<br>e |
|-------------------------------------------------|----------------------------------------|-----------------------------------------------------|--------------------|------------------------------------------------------------------------------------------------|---------------|
| $\text{Pt}_7\text{Sn}_3$ alloy NWs              | 0.340                                  | 0.35 @ 0.600 V vs. RHE                              | -                  | 0.600 V vs. RHE 3600 s decrease from 0.500 $\text{mA cm}^{-2}$ to 0.200 $\text{mA cm}^{-2}$    | 1             |
| $\text{PtSn}_3$ alloy                           | 32.0                                   | 1.25@ 0.9 V vs. RHE                                 | -                  | 0.500 V vs. RHE 500 s decrease from 0.300 $\text{mA cm}^{-2}$ to 0.0500 $\text{mA cm}^{-2}$    | 2             |
| $\text{Pt}_{70}\text{Sn}_{30}$<br>intermetallic | 13.0                                   | 1.41@ 0.350 V vs.<br>Ag/AgCl                        | -                  | 0.350 V vs. Ag/AgCl 3600 s decrease from 1.50 $\text{mA cm}^{-2}$ to 0.250 $\text{mA cm}^{-2}$ | 3             |
| PtSn alloy                                      | -                                      | 0.8@ 0.920 V vs. RHE                                | 0.920 V vs.<br>RHE | 0.500 V vs. RHE 600 s decrease from 0.15 $\text{mA cm}^{-2}$ to 0.005 $\text{mA cm}^{-2}$      | 4             |
| PtRhSn alloy                                    | 2.65                                   | 1.78 @ 0.600 V vs.<br>Ag/AgCl                       | -                  | 0.350 V vs. Ag/AgCl 300 s decrease from 1.50 $\text{mA cm}^{-2}$ to 0.220 $\text{mA cm}^{-2}$  | 5             |
| PtSn nanoparticle                               | -                                      | 0.70 @ 0.920 V vs. RHE                              | 0.920 V vs.<br>RHE | 0.5 V vs. RHE 600 s decrease from 0.17 $\text{mA cm}^{-2}$ to 0.004 $\text{mA cm}^{-2}$        | 6             |
| Our work (PtSn)                                 | 34.8                                   | 2.30@ 0.629 V vs. SCE                               |                    | 0.500 V vs. SCE 3600 S decrease from 1.90 $\text{mA cm}^{-2}$ to 0.322 $\text{mA cm}^{-2}$     |               |
| Our work (PtSn <sub>4</sub> )                   | 30.9                                   | 1.78@ 0.612 V vs. SCE                               |                    | 0.500 V vs. SCE 3600 S 1.30 $\text{mA cm}^{-2}$ , to 0.198 $\text{mA cm}^{-2}$                 |               |

## Notes and references

- 1 L. Li, H. Liu, C. Qin, Z. Liang, A. Scida, S. Yue, X. Tong, R. R. Adzic and S. S. Wong, Ultrathin  $\text{Pt}_x\text{Sn}_{1-x}$  Nanowires for Methanol and Ethanol Oxidation Reactions: Tuning Performance by Varying Chemical Composition, *ACS Appl. Nano Mater.*, 2018, **1**, 1104-1115.
- 2 R. Rizo, R. M. Arán-Ais, E. Padgett, D. A. Muller, M. J. Lázaro, J. Solla-Gullón, J. M. Feliu, E. Pastor and H. D. Abruña, Pt-Rich<sub>core</sub>/Sn-Rich<sub>subsurface</sub>/Pt<sub>skin</sub> Nanocubes As Highly Active and Stable Electrocatalysts for the Ethanol Oxidation Reaction, *J. Am. Chem. Soc.*, 2018, **140**, 3791-3797.
- 3 W. Du, G. Yang, E. Wong, N. A. Deskins, A. I. Frenkel, D. Su and X. Teng, Platinum-Tin Oxide Core-Shell Catalysts for Efficient Electro-Oxidation of Ethanol, *J. Am. Chem. Soc.*, 2014, **136**, 10862-10865.
- 4 R. Rizo, M. Jesus Lazaro, E. Pastor and G. Garcia, Spectroelectrochemical Study of Carbon Monoxide and Ethanol Oxidation on Pt/C, PtSn(3:1)/C and PtSn(1:1)/C Catalysts, *Molecules*, 2016, **21**.
- 5 N. Erini, R. Loukrakpam, V. Petkov, E. A. Baranova, R. Z. Yang, D. Teschner, Y. H. Huang, S. R. Brankovic and P. Strasser, Ethanol Electro-Oxidation on Ternary Platinum-Rhodium-Tin Nanocatalysts: Insights in the Atomic 3D Structure of the Active Catalytic Phase, *ACS Catal.*, 2014, **4**, 1859-1867.
- 6 R. Rizo, D. Sebastián, M. J. Lázaro and E. Pastor, On the design of Pt-Sn efficient catalyst for carbon monoxide and ethanol oxidation in acid and alkaline media, *Appl. Catal., B*, 2017, **200**, 246-254.
- 7 J. Ding, L. Bu, S. Guo, Z. Zhao, E. Zhu, Y. Huang and X. Huang, Morphology and Phase Controlled Construction of Pt-Ni Nanostructures for Efficient Electrocatalysis, *Nano Lett.*, 2016, **16**, 2762-2767.
